# Supplementary material for: Biological and immunological significance of DLL3 expression in different tumor tissues: a pan-cancer analysis
Source: Aging (Albany NY). 2023 Apr 22;15(9):3427–41. doi: 10.18632/aging.204672 (PMC10449286; doi:10.18632/aging.204672)
Supplement: Supplementary File 1 [file aging-15-204672-s001.xlsx]

## Sheet: OS
Supplementary File 1. The Kaplan-Meier survival analysis of TET1 in pan-cancer.
CancerType	statistics.chisq	pValue
ACC	12.9458	0.000320639
BLCA	1.90078	0.167992
BRCA	4.036	0.0445393
CESC	6.23284	0.0125402
CHOL	6.05445	0.0138713
COAD	4.4982	0.0339306
DLBC	2.37815	0.123043
EAC	9.22638	0.00238552
ESCC	3.00654	0.082929
GBM	7.76114	0.00533822
HNSC	9.06863	0.00260032
KICH	2.28271	0.130823
KIRC	12.9253	0.000324171
KIRP	54.7344	1.3797e-13
LAML	13.4224	0.000248635
LGG	40.0756	2.4432e-10
LIHC	15.8047	7.02279e-05
LUAD	4.06812	0.0436999
LUSC	2.20719	0.137369
MESO	4.96743	0.0258289
OV	6.10054	0.0135141
PAAD	5.87152	0.0153878
PCPG	3.06532	0.0799796
PRAD	7.35989	0.00666948
READ	3.81448	0.0508114
SARC	12.9452	0.000320749
SKCM	18.9914	1.31307e-05
STAD	2.17746	0.140045
TGCT	2.35311	0.125034
THCA	3.19502	0.073863
THYM	6.27773	0.0122264
UCEC	13.4901	0.000239821
UCS	0.483329	0.486918
UVM	9.8733	0.00167695

## Sheet: DSS
CancerType	statistics.chisq	pValue
ACC	11.5031	0.000694787
BLCA	4.05332	0.0440846
BRCA	6.00011	0.014305
CESC	5.08429	0.0241436
CHOL	9.21836	0.00239601
COAD	5.32393	0.0210346
DLBC	2.1451	0.143026
EAC	18.8606	1.40631e-05
ESCC	2.08241	0.149005
GBM	6.95552	0.00835612
HNSC	2.58989	0.107548
KICH	2.58159	0.108113
KIRC	8.72661	0.00313599
KIRP	76.6379	2.05365e-18
LGG	53.0647	3.22745e-13
LIHC	6.18975	0.0128492
LUAD	2.22839	0.135495
LUSC	2.22557	0.135742
MESO	3.88789	0.0486356
OV	6.25867	0.0123587
PAAD	2.83484	0.0922399
PCPG	6.25344	0.0123953
PRAD	10.7754	0.00102855
READ	2.14289	0.143231
SARC	9.77881	0.00176534
SKCM	16.3729	5.20251e-05
STAD	5.78436	0.0161694
TGCT	1.40423	0.236017
THCA	10.8842	0.000969867
THYM	4.17059	0.0411314
UCEC	17.3471	3.1137e-05
UCS	0.440471	0.506895
UVM	8.59733	0.00336656

## Sheet: DFI
CancerType	statistics.chisq	pValue
ACC	3.35363	0.0670569
BLCA	8.3238	0.00391289
BRCA	6.04801	0.013922
CESC	2.65437	0.103266
CHOL	0.690817	0.405887
COAD	9.00899	0.00268655
DLBC	4.94521	0.0261631
EAC	2.79441	0.0945937
ESCC	1.82184	0.177094
HNSC	0.875729	0.349374
KICH	2.4977	0.114013
KIRC	1.2623	0.261216
KIRP	5.38654	0.0202927
LGG	2.15721	0.141902
LIHC	2.34585	0.125617
LUAD	4.16055	0.041376
LUSC	5.15403	0.0231925
MESO	0.899465	0.342925
OV	4.23062	0.039701
PAAD	4.60694	0.0318428
PCPG	5.12762	0.023548
PRAD	2.96138	0.0852752
READ	3.73402	0.053315
SARC	4.36859	0.0366073
STAD	9.96649	0.00159415
TGCT	5.34168	0.0208213
THCA	6.17778	0.0129364
UCEC	9.56857	0.00197937
UCS	7.6575	0.00565368

## Sheet: PFI
CancerType	statistics.chisq	pValue
ACC	18.2253	1.96257e-05
BLCA	6.77652	0.0092365
BRCA	5.18609	0.0227684
CESC	2.4433	0.118028
CHOL	8.04753	0.00455658
COAD	6.22346	0.0126069
DLBC	3.35221	0.067115
EAC	4.85869	0.0275073
ESCC	2.10957	0.14638
GBM	11.7141	0.00062029
HNSC	3.36413	0.0666308
KICH	5.15072	0.0232368
KIRC	11.9311	0.000552054
KIRP	39.4586	3.3508e-10
LGG	47.6064	5.2099e-12
LIHC	6.88348	0.00869961
LUAD	2.47135	0.115938
LUSC	3.85464	0.0496085
MESO	4.54252	0.0330629
OV	2.57062	0.108865
PAAD	9.60909	0.00193617
PCPG	17.9519	2.26556e-05
PRAD	17.6095	2.7123e-05
READ	2.5457	0.110595
SARC	5.28467	0.021514
SKCM	5.49344	0.019088
STAD	7.77032	0.00531115
TGCT	1.3942	0.237696
THCA	10.2461	0.00136973
THYM	4.63368	0.0313503
UCEC	12.9398	0.000321663
UCS	2.34671	0.125548
UVM	6.55231	0.0104748
