# Supplementary material for: Biological and immunological significance of DLL3 expression in different tumor tissues: a pan-cancer analysis
Source: Aging (Albany NY). 2023 Apr 22;15(9):3427–41. doi: 10.18632/aging.204672 (PMC10449286; doi:10.18632/aging.204672)
Supplement: Supplementary File 2 [file aging-15-204672-s002.xlsx]

## Sheet: B cells memory
Supplementary File 2. The correlations between TET1 expression and TILs.
CancerType	cor	p.value
ACC	0.0830509	0.466818
BLCA	-0.0645612	0.19093
BRCA	0.0211124	0.481662
CESC	-0.106325	0.063228
CHOL	0.0618269	0.724218
COAD	-0.0377387	0.409399
DLBC	0.253054	0.0826763
EAC	-0.186005	0.0963983
ESCC	0.0364028	0.745417
GBM	-0.0674107	0.383849
HNSC	-0.0446866	0.31672
KIRC	0.0474984	0.270092
KIRP	-0.0963117	0.101068
LGG	0.0878494	0.0428255
LIHC	0.0393316	0.448221
LUAD	-0.115651	0.00719285
LUSC	-0.108061	0.0154262
MESO	-0.098786	0.362655
OV	-0.00536687	0.916841
PAAD	0.0379853	0.613678
PCPG	0.0461197	0.534162
PRAD	-0.0537955	0.229375
READ	-0.0602653	0.439136
SARC	0.0642251	0.299425
SKCM	-0.137691	0.00271967
STAD	-0.10258	0.0471373
TGCT	-0.173856	0.0299646
THCA	0.11022	0.0125779
UCEC	0.0881554	0.0380529
UCS	0.0281004	0.835624
UVM	-0.109266	0.334639

## Sheet: B cells naive
CancerType	cor	p.value
ACC	0.0657456	0.564839
BLCA	0.00265989	0.957074
BRCA	0.00112746	0.970029
CESC	-0.0558171	0.330472
CHOL	-0.0832339	0.634529
COAD	-0.0187213	0.682444
DLBC	-0.0484646	0.743581
EAC	0.277029	0.0122896
ESCC	0.11085	0.321472
GBM	0.186874	0.0149826
HNSC	-0.049679	0.265619
KICH	-0.272502	0.028085
KIRC	-0.0611595	0.155441
KIRP	0.173291	0.00301822
LGG	-0.123381	0.00437206
LIHC	-0.0881467	0.0887019
LUAD	0.0999743	0.0202615
LUSC	0.127506	0.00421809
MESO	-0.0372473	0.731964
OV	0.0299596	0.559895
PAAD	0.187776	0.0118324
PCPG	-0.061089	0.410068
PRAD	-0.0923293	0.0388416
READ	0.0865042	0.266324
SARC	-0.00944659	0.878815
SKCM	0.0690882	0.133928
STAD	0.169596	0.000976688
TGCT	0.105285	0.190848
THCA	-0.0192938	0.663169
UCEC	0.0914625	0.0313642
UCS	0.0831928	0.538393
UVM	0.229635	0.0404564

## Sheet: Dendritic cells activated
CancerType	cor	p.value
ACC	0.236769	0.0356518
BLCA	-0.103001	0.0366258
BRCA	0.0455332	0.128978
CESC	0.00310093	0.956917
CHOL	0.138423	0.427772
COAD	-0.094368	0.0387602
DLBC	0.23656	0.10549
EAC	-0.146676	0.191332
ESCC	-0.11715	0.294562
GBM	-0.141108	0.0672558
HNSC	-0.0270234	0.544994
KICH	-0.0290005	0.81862
KIRC	-0.121006	0.00482657
KIRP	0.0638816	0.277409
LGG	-0.00483774	0.911362
LIHC	-0.025093	0.628579
LUAD	-0.150362	0.000460577
LUSC	-0.0621704	0.164279
MESO	-0.285937	0.00725798
OV	0.0173157	0.73619
PAAD	-0.0325043	0.665781
PCPG	0.0294796	0.691189
PRAD	-0.176394	7.20087e-05
READ	-0.00967957	0.901196
SARC	-0.0742644	0.230028
SKCM	-0.0025126	0.956582
STAD	-0.0517862	0.317234
TGCT	0.0413093	0.608635
THCA	-0.119389	0.00683967
UCEC	0.15708	0.000205666
UCS	-0.00141506	0.991665
UVM	-0.0817314	0.471076

## Sheet: Dendritic cells resting
CancerType	cor	p.value
ACC	-0.100965	0.375964
BLCA	-0.0891552	0.0706444
BRCA	-0.0701816	0.0191998
CESC	-0.0569255	0.320944
CHOL	-0.0233403	0.894125
COAD	0.0103571	0.820947
DLBC	-0.107916	0.465334
EAC	0.0515296	0.64777
ESCC	-0.0748596	0.503869
GBM	-0.0748035	0.333753
HNSC	-0.116559	0.00881419
KICH	-0.199765	0.110616
KIRC	-0.0311707	0.469366
KIRP	-0.014974	0.799224
LGG	0.0770456	0.0758111
LIHC	0.0885504	0.0872452
LUAD	-0.216244	4.00223e-07
LUSC	-0.0705307	0.114499
MESO	0.0231745	0.83128
OV	-0.133946	0.00885165
PAAD	-0.0763382	0.30979
PCPG	0.0266238	0.719786
PRAD	0.0856331	0.0554338
READ	-0.183056	0.0178903
SARC	-0.115938	0.0604386
SKCM	0.0434413	0.346331
STAD	-0.0221277	0.669289
TGCT	-0.0296313	0.713471
THCA	-0.330664	1.57998e-14
UCEC	-0.192836	4.84167e-06
UCS	-0.219048	0.101613
UVM	-0.161954	0.151214

## Sheet: Eosinophils
CancerType	cor	p.value
ACC	0.135923	0.23232
BLCA	-0.0586588	0.234814
BRCA	0.0118776	0.692234
CESC	0.216955	0.00013062
CHOL	-0.0187843	0.914708
COAD	0.00267707	0.953351
EAC	-0.0658474	0.559187
ESCC	-0.0721916	0.519233
GBM	0.0678896	0.380472
HNSC	0.065478	0.14213
KICH	-0.194985	0.11959
KIRC	0.0180905	0.674606
KIRP	0.0786434	0.180944
LGG	-0.0204461	0.637975
LIHC	0.0118537	0.819272
LUAD	-0.0989939	0.0215281
LUSC	0.0880464	0.0486526
MESO	-0.0342318	0.752938
OV	-0.0952523	0.0632589
PAAD	-0.157267	0.0355142
PCPG	0.019503	0.792725
PRAD	-0.0480521	0.283054
READ	0.0592831	0.446644
SARC	0.0957861	0.121248
SKCM	0.107185	0.0198489
STAD	0.10498	0.0421784
TGCT	0.0135694	0.866483
THCA	0.104211	0.0183402
UCEC	0.0432597	0.309444
UCS	-0.163075	0.225493
UVM	0.105355	0.352327

## Sheet: Macrophages M0
CancerType	cor	p.value
ACC	0.30108	0.00701203
BLCA	0.189342	0.000110375
BRCA	0.129192	1.53682e-05
CESC	0.165077	0.00378264
CHOL	0.104783	0.549142
COAD	0.138649	0.00233111
DLBC	-0.0510204	0.730556
EAC	-0.0387927	0.730968
ESCC	0.00987792	0.929815
GBM	0.179517	0.0195222
HNSC	0.107137	0.0161204
KICH	-0.217869	0.0812567
KIRC	0.0572802	0.183414
KIRP	-0.158219	0.00684172
LGG	-0.0837748	0.0534674
LIHC	0.20723	5.38782e-05
LUAD	0.157245	0.000247334
LUSC	0.0376131	0.400386
MESO	0.0310301	0.775405
OV	0.0549272	0.28488
PAAD	-0.108517	0.148189
PCPG	0.141921	0.0546391
PRAD	-0.00317729	0.943446
READ	0.165478	0.0325869
SARC	0.224279	0.00024571
SKCM	0.104225	0.023542
STAD	0.0775046	0.134104
TGCT	0.0348374	0.665922
THCA	-0.221713	4.02575e-07
UCEC	-0.0324119	0.446441
UCS	0.130414	0.333579
UVM	0.0738874	0.514815

## Sheet: Macrophages M1
CancerType	cor	p.value
ACC	-0.194597	0.0857023
BLCA	0.0874597	0.0761885
BRCA	0.0224351	0.454626
CESC	-0.0803987	0.160641
CHOL	-0.11207	0.52155
COAD	-0.0801588	0.0793557
DLBC	-0.231654	0.11313
EAC	0.149765	0.182048
ESCC	-0.0203855	0.855753
GBM	0.0663592	0.391328
HNSC	-0.107811	0.0154607
KICH	-0.0240077	0.849444
KIRC	-0.0991524	0.0210784
KIRP	0.0519055	0.377655
LGG	-0.164329	0.000140508
LIHC	-0.150022	0.00363687
LUAD	0.0871594	0.0431063
LUSC	0.0102387	0.818997
MESO	-0.0495576	0.648507
OV	-0.0320566	0.532743
PAAD	-0.0074947	0.920685
PCPG	0.0789785	0.286568
PRAD	0.0601693	0.178746
READ	-0.0594251	0.445554
SARC	-0.102702	0.0965095
SKCM	-0.149961	0.00108366
STAD	-0.0844558	0.102482
TGCT	0.285512	0.000302842
THCA	0.00745626	0.866343
UCEC	0.0968854	0.0225704
UCS	-0.0169404	0.900466
UVM	-0.163289	0.147828

## Sheet: Macrophages M2
CancerType	cor	p.value
ACC	-0.269552	0.0162929
BLCA	-0.0583531	0.237266
BRCA	-0.14517	1.15352e-06
CESC	0.0845197	0.140191
CHOL	-0.301845	0.0780273
COAD	0.0631922	0.166897
DLBC	0.106817	0.469916
EAC	-0.0843976	0.453791
ESCC	0.0254253	0.820628
GBM	0.0433991	0.575298
HNSC	0.0173178	0.698128
KICH	0.0107072	0.932538
KIRC	-0.0950515	0.0270542
KIRP	-0.180969	0.00193883
LGG	0.0235432	0.58794
LIHC	-0.137212	0.00787798
LUAD	-0.153341	0.000353049
LUSC	0.0559105	0.211099
MESO	0.0158023	0.884497
OV	-0.0327631	0.523747
PAAD	0.126426	0.0917208
PCPG	-0.0468253	0.527918
PRAD	0.0344194	0.442064
READ	0.00657234	0.932821
SARC	-0.155024	0.0118247
SKCM	-0.0163668	0.722846
STAD	-0.0638194	0.21758
TGCT	-0.130957	0.103201
THCA	0.062567	0.157463
UCEC	0.0304263	0.474796
UCS	-0.00635209	0.962597
UVM	-0.0534224	0.637897

## Sheet: Mast cells activated
CancerType	cor	p.value
ACC	0.0809692	0.478098
BLCA	0.068166	0.167273
BRCA	-0.00720382	0.81028
CESC	0.073697	0.198568
CHOL	0.0995654	0.569314
COAD	0.0409033	0.371223
EAC	-0.171438	0.125938
ESCC	0.138255	0.215459
GBM	0.0645729	0.404231
HNSC	0.123051	0.00567243
KICH	-0.0521605	0.679861
KIRC	-0.0438745	0.308381
KIRP	-0.0271676	0.644415
LGG	0.102122	0.0184687
LIHC	0.0651227	0.208923
LUAD	0.000437918	0.991907
LUSC	-0.0351533	0.431926
MESO	-0.138152	0.201924
OV	-0.101587	0.0475347
PAAD	0.0230514	0.759386
PCPG	-0.208782	0.00445277
PRAD	-0.0641806	0.151444
READ	0.196092	0.0110934
SARC	0.129556	0.0357386
SKCM	-0.00891366	0.846846
STAD	0.0211866	0.682575
TGCT	-0.0534958	0.507162
THCA	0.127158	0.00395233
UCEC	-0.12356	0.00358127
UCS	0.040275	0.76612
UVM	0.0511576	0.652234

## Sheet: Mast cells resting
CancerType	cor	p.value
ACC	-0.208543	0.0651302
BLCA	-0.148933	0.00243949
BRCA	-0.213698	5.81761e-13
CESC	-0.13923	0.0147911
CHOL	-0.0323397	0.853681
COAD	-0.0652406	0.153538
DLBC	-0.0278517	0.850946
EAC	0.0212128	0.850901
ESCC	-0.180719	0.104214
GBM	0.00562308	0.942158
HNSC	-0.179341	5.14195e-05
KICH	-0.0581921	0.645195
KIRC	-0.151119	0.000420163
KIRP	0.0231504	0.694121
LGG	-0.0271514	0.532042
LIHC	-0.240174	2.62536e-06
LUAD	-0.238022	2.22184e-08
LUSC	-0.0889768	0.0463118
MESO	0.0435874	0.688518
OV	0.0672738	0.190094
PAAD	-0.101303	0.177232
PCPG	0.117214	0.113056
PRAD	0.0278638	0.533785
READ	-0.177323	0.0218764
SARC	-0.27857	4.49111e-06
SKCM	0.00917809	0.842361
STAD	-0.134243	0.00924898
TGCT	-0.0572829	0.477523
THCA	-0.165243	0.00017283
UCEC	0.0973312	0.0219535
UCS	-0.359984	0.00595082
UVM	0.0844707	0.456289

[truncated: 12 more sheets: Monocytes, Neutrophils, NK cells activated, NK cells resting, Plasma cells, T cells CD4 memory activated, T cells CD4 memory resting, T cells CD4 naive, T cells CD8, T cells follicular helper, T cells gamma delta, T cells regulatory (Tregs)]
